# Supplementary material
Source: publisher figshare collection journal article supplement (https://scielo.figshare.com/articles/dataset/_/11756640)
Supplement: Supplementary file 1 [file Table_1.xls]

## Sheet: Table_1
<b>Treatments</b>	<b>Plant species used as green manure crops</b>
1	Brown hemp <em>(Crotalaria juncea</em> L.)
2	Millet <em>(Pennisetum glaucum</em>)
3	Brown hemp <em>(Crotalaria juncea</em> L.) in intercropping with millet <em>(Pennisetum glaucum</em>)
4	Corn <em>(Zea mays</em>) in intercropping with Brachiaria <em>(Urochloa brizantha</em> syn. <em>Brachiaria brizantha</em>)
5	Conventional - Spontaneous vegetation incorporated into the soil, use of plastic mulch for melon production<a href="#TFN1">*</a>
6	Soil without vegetation
7	Spontaneous vegetation, without plastic mulch for melon production
8	Pigeon pea <em>[Cajanus cajan</em> (L.) Millspaugh]
9	Pigeon pea <em>[Cajanus cajan</em> (L.) Millspaugh] in intercropping with millet <em>(Pennisetum glaucum)</em>
10	Jack bean <em>(Canavalia ensiformis)</em>
11	Jack bean <em>(Canavalia ensiformis)</em> in intercropping with millet <em>(Pennisetum glaucum)</em>
12	Corn <em>(Zea mays)</em> in intercropping with <em>Brachiaria (Urochloa brizantha</em> syn. <em>Brachiaria brizantha)</em> with spontaneous vegetation
