# Supplementary material
Source: publisher figshare collection journal article supplement (https://scielo.figshare.com/articles/dataset/_/11756640)
Supplement: Supplementary file 2 [file Table_2.xls]

## Sheet: Table_2
<b>SV</b>	<b>DF</b>	<b>Sum of squares</b>	<b>Mean square</b>	<b>Cf</b>	<b>Pr>Cf</b>
YEAR	2	4630.522338	2315.261169	120.840	0.0000<a href="#TFN2">*</a>
SYST	1	1409.097089	1409.097089	73.545	0.0000<a href="#TFN2">*</a>
COVER	11	575.403278	52.309389	2.730	0.0025<a href="#TFN2">*</a>
BLOCK	3	60.256275	20.085425	1.048	0.372<sup>NS</sup>
YEAR<a href="#TFN2">*</a>SYST	2	482.761463	241.380732	12.598	0.0000<a href="#TFN2">*</a>
YEAR<a href="#TFN2">*</a>COVER	22	603.238887	27.419949	1.431	0.1021<sup>NS</sup>
SYST<a href="#TFN2">*</a>COVER	11	523.257428	47.568857	2.483	0.0060<a href="#TFN2">*</a>
YEAR<a href="#TFN2">*</a>SYST<a href="#TFN2">*</a>COVER	22	444.833045	20.219684	1.055	0.3987<sup>NS</sup>
ERROR	213	4081.032125	19.159775
Corrected total	287	12810.401928
CV (%)	34.86
