# Supplementary material
Source: publisher figshare collection journal article supplement (https://scielo.figshare.com/articles/dataset/_/11756640)
Supplement: Supplementary file 3 [file Table_3.xls]

## Sheet: Table_3
<b>Cropping system</b>	<b>YEAR<a href="#TFN4">*</a></b>						<b>Average</b>
	2011		2012		2013
With tillage	22.04	aA	11.80	bA	10.47	bA	14.77
Without tillage	14.41	aB	7.45	bB	9.17	bA	10.34
Average	18.23		9.63		9.82		12.56
