# Supplementary material
Source: publisher figshare collection journal article supplement (https://scielo.figshare.com/articles/dataset/_/11756640)
Supplement: Supplementary file 4 [file Table_4.xls]

## Sheet: Table_4
<b>Treatments</b>	<b>Without tillage</b>		<b>With tillage</b>		<b>Average</b>
1	11.15	Aa	13.64	Aa	12.40
2	12.09	Aa	15.10	Aa	13.60
3	10.26	Aa	16.01	Ba	13.14
4	9.95	Aa	16.60	Ba	13.28
5	12.07	Aa	14.12	Aa	13.10
6	6.50	Aa	14.64	Ba	10.57
7	10.86	Aa	9.90	Aa	10.38
8	9.12	Aa	15.13	Ba	12.13
9	10.77	Aa	12.86	Aa	11.82
10	9.22	Aa	17.70	Ba	13.46
11	8.33	Aa	13.98	Ba	11.16
12	13.78	Aa	17.50	Ba	15.64
Average	10.34		14.77		12.55
